# Supplementary material for: Conditional loss of ERK1 and ERK2 results in abnormal placentation and delayed parturition in the mouse
Source: PubMed Central journal article supplement (PMC6610138; doi:10.1038/s41598-019-45997-0), 2019-07-03

# **Conditional loss of ERK1 and ERK2 results in abnormal placentation and delayed parturition in the mouse**

Jessica L. Brown<sup>1</sup>, Jennifer L. Sones<sup>1,2</sup>, Cynthia N. Angulo<sup>1</sup>, Keelin Abbott<sup>1</sup>, Andrew D. Miller<sup>1</sup>, Ulrich Boehm<sup>3</sup> and Mark S. Roberson<sup>1</sup>

<sup>1</sup>Dept. Biomedical Science, College of Veterinary Medicine, Cornell University, Ithaca, NY

<sup>2</sup>Dept. Veterinary Clinical Sciences, School of Veterinary Medicine, Louisiana State University, Baton Rouge, LA

<sup>3</sup>Experimental Pharmacology, Center for Molecular Signaling (PZMS), Saarland University School of Medicine, Homburg, Germany

## **Supplementary Figures**

# Supplemental Figure 1

A. e12.5

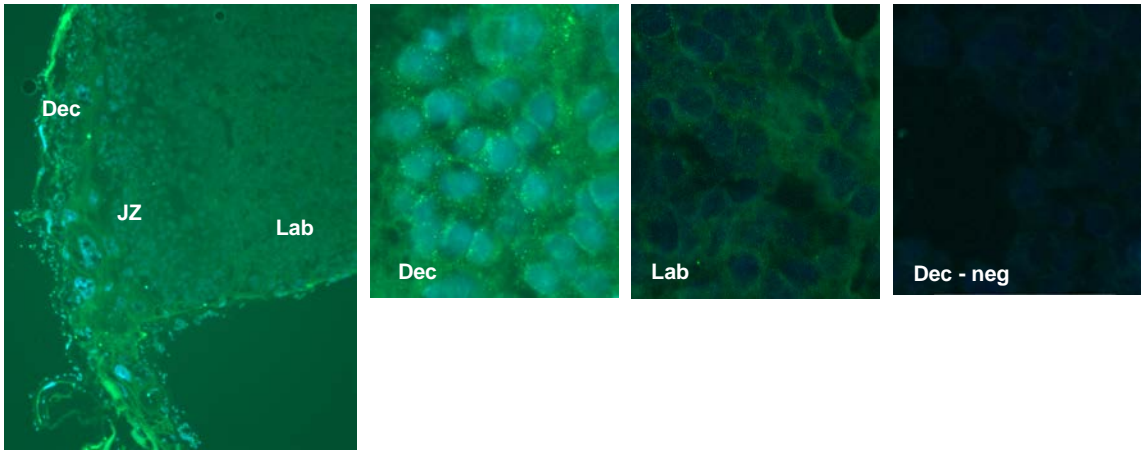

B. e18.5

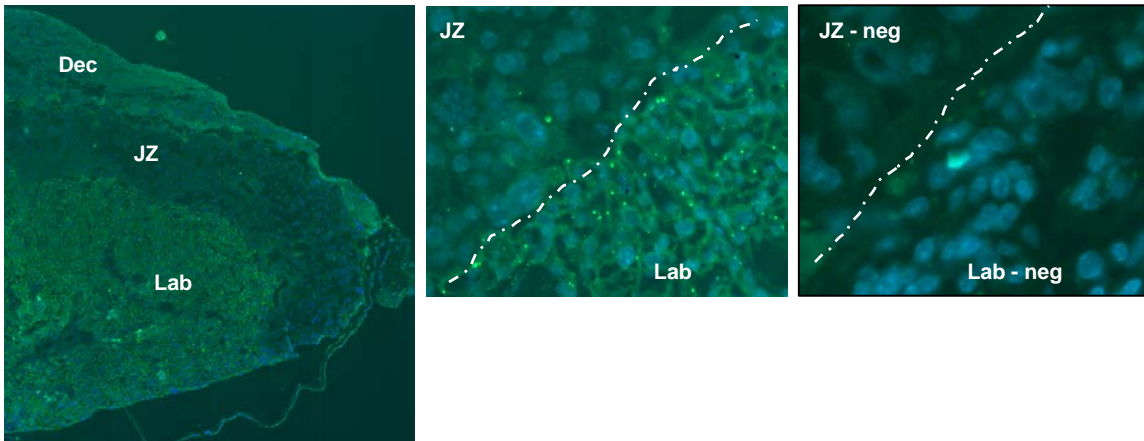

## Supplemental Figure 2

**A.**

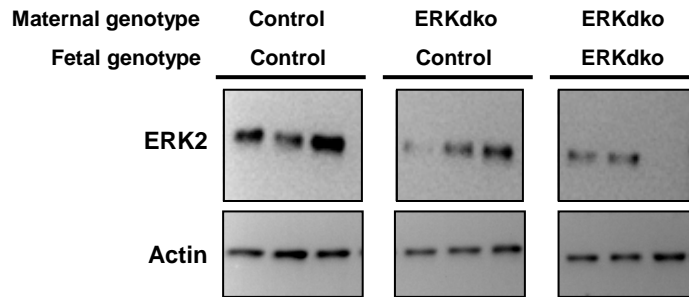

**B.**

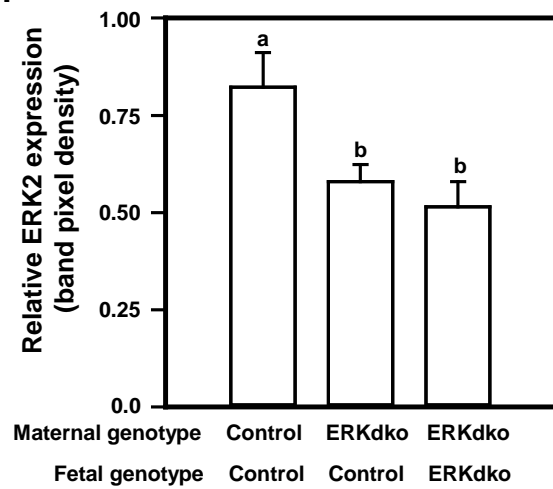

# Supplemental Figure 3

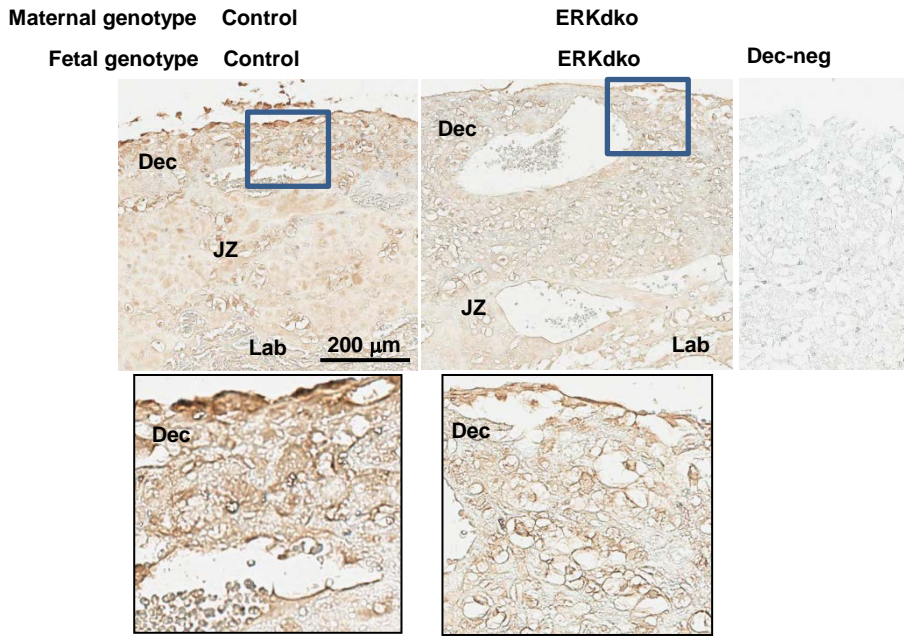

# Supplemental Figure 4 - Uncropped western blot gels from Supplementary Figure 2A

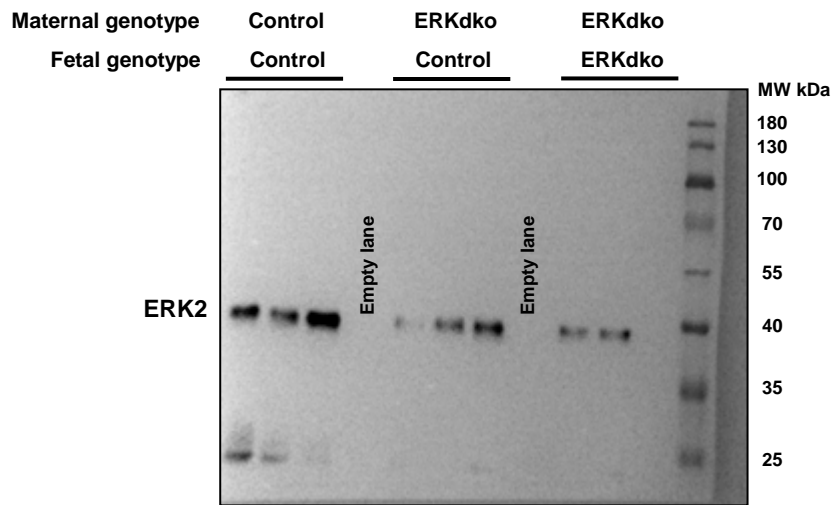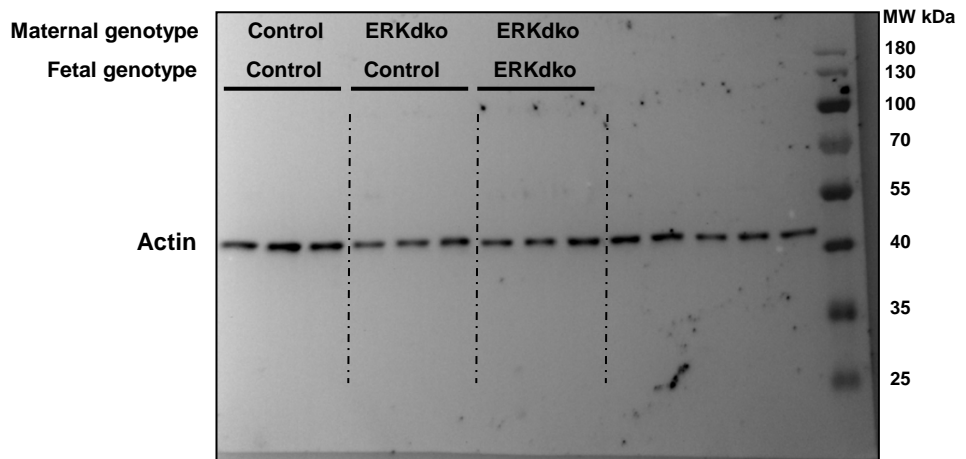

Supplement: 41598_2019_45997_MOESM1_ESM.pdf [file 41598_2019_45997_MOESM1_ESM.pdf]
